# Supplementary material
Source: PubMed Central journal article supplement (PMC3567491)

# Supplementary Figure 7 Source Data

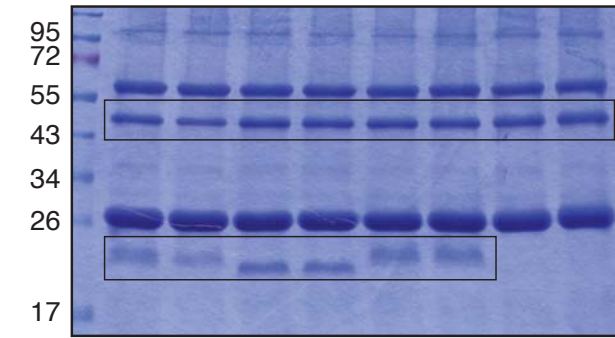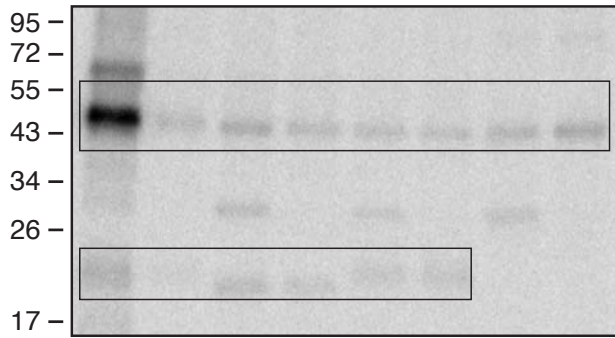

Supplement: emboj2012315s11.pdf [file emboj2012315s11.pdf]
